# Supplementary material for: Searching for stable copper borozene complexes in CuB7− and CuB8−
Source: Royal Society of Chemistry journal article supplement (doi:10.1039/d4cp00296b), 2024-01-01
Supplement: d4cp00296b1.pdf [file d4cp00296b1.pdf]

## Supplementary Information

### Searching for Stable Copper Borazene Complexes, $\text{CuB}_7^-$ and $\text{CuB}_8^-$

Wei-Jia Chen,<sup>‡a</sup> Anton S. Pozdeev,<sup>‡b</sup> Hyun Wook Choi,<sup>a</sup> Alexander I. Boldyrev<sup>c</sup>, Dao-Fu Yuan,<sup>\*a,d</sup> Ivan A. Popov<sup>\*b</sup> and Lai-Sheng Wang<sup>\*a</sup>

<sup>a</sup>Department of Chemistry, Brown University, Providence, Rhode Island 02912, USA. E-mail: [lai-sheng\\_wang@brown.edu](mailto:lai-sheng_wang@brown.edu)

<sup>b</sup>Department of Chemistry, The University of Akron, Akron, Ohio 44325, USA. E-mail: [ipopov@uakron.edu](mailto:ipopov@uakron.edu)

<sup>c</sup>Department of Chemistry and Biochemistry, Utah State University, Logan, Utah 84322, USA.

<sup>d</sup>Hefei National Research Center for Physical Sciences at the Microscale, University of Science and Technology of China, Hefei 230026, China. E-mail: [ydfu@ustc.edu.cn](mailto:ydfu@ustc.edu.cn)

‡These authors contributed equally to this work.

Table S1 Population sizes for each cluster employed in the CK search.

| Stoichiometry                                 | Population Size |
|-----------------------------------------------|-----------------|
| $\text{CuB}_7^-$ (doublet and quartet states) | 2000            |
| $\text{CuB}_7$ (singlet and triplet states)   | 1500            |
| $\text{CuB}_8^-$ (singlet and triplet states) | 2700            |
| $\text{CuB}_8$ (doublet and quartet states)   | 2400            |

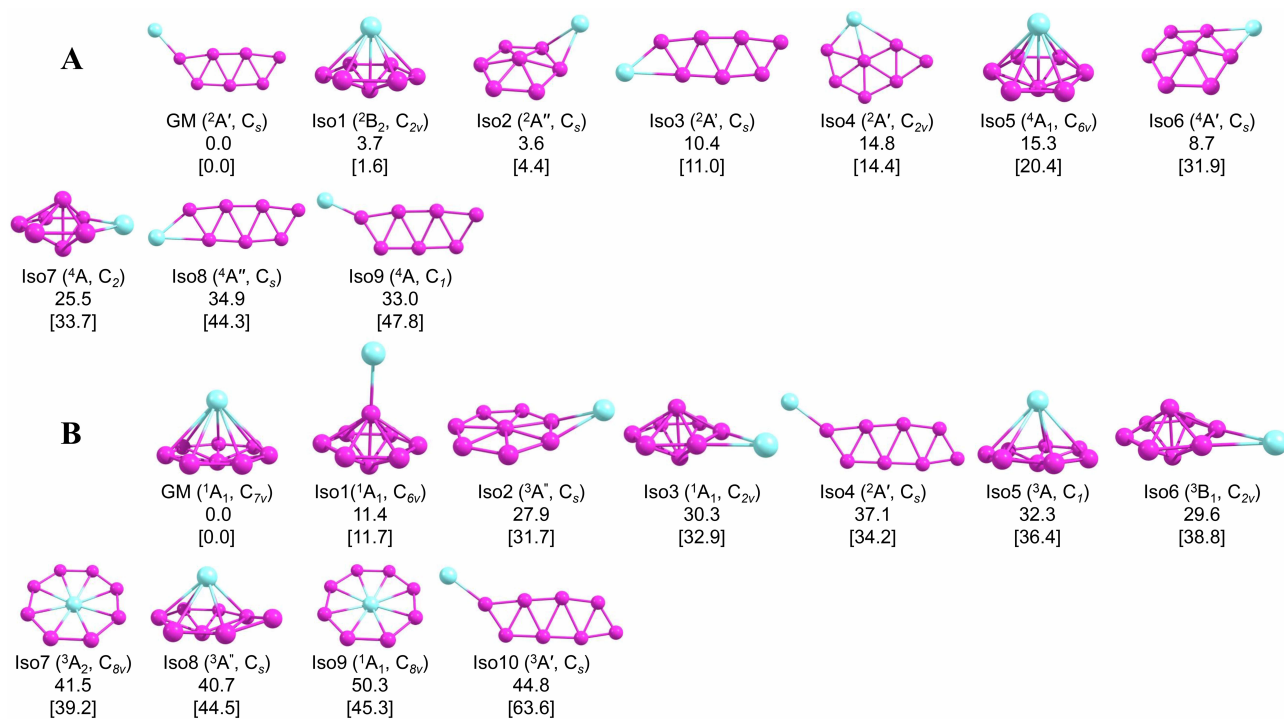

Fig. S1 Low-lying structures of (A)  $CuB_7^-$  and (B)  $CuB_8^-$  found via the CK search. Relative energies in kcal/mol are given at PBE0/def2-TZVPD with the CCSD(T)/aug-cc-pVQZ values shown in the brackets.

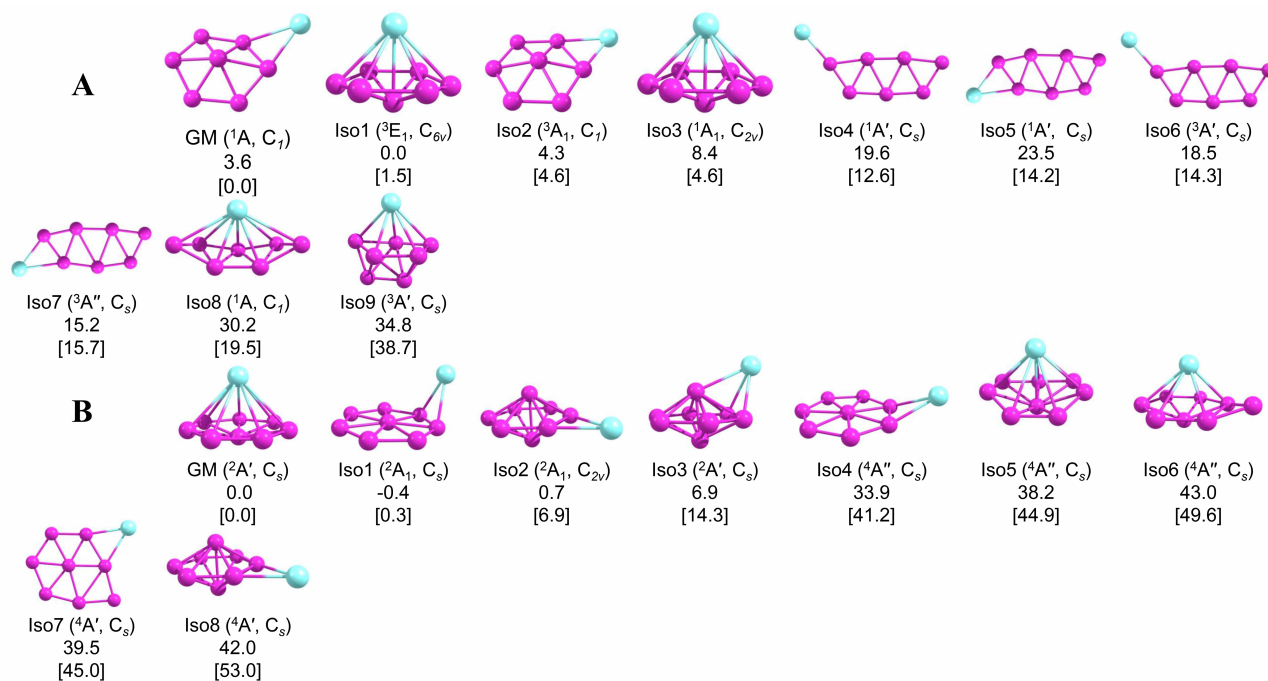

Fig. S2 Low-lying structures of (A)  $CuB_7$  and (B)  $CuB_8$  found via the CK search. Relative energies in kcal/mol are given at PBE0/def2-TZVPD with the CCSD(T)/aug-cc-pVQZ values shown in the brackets.

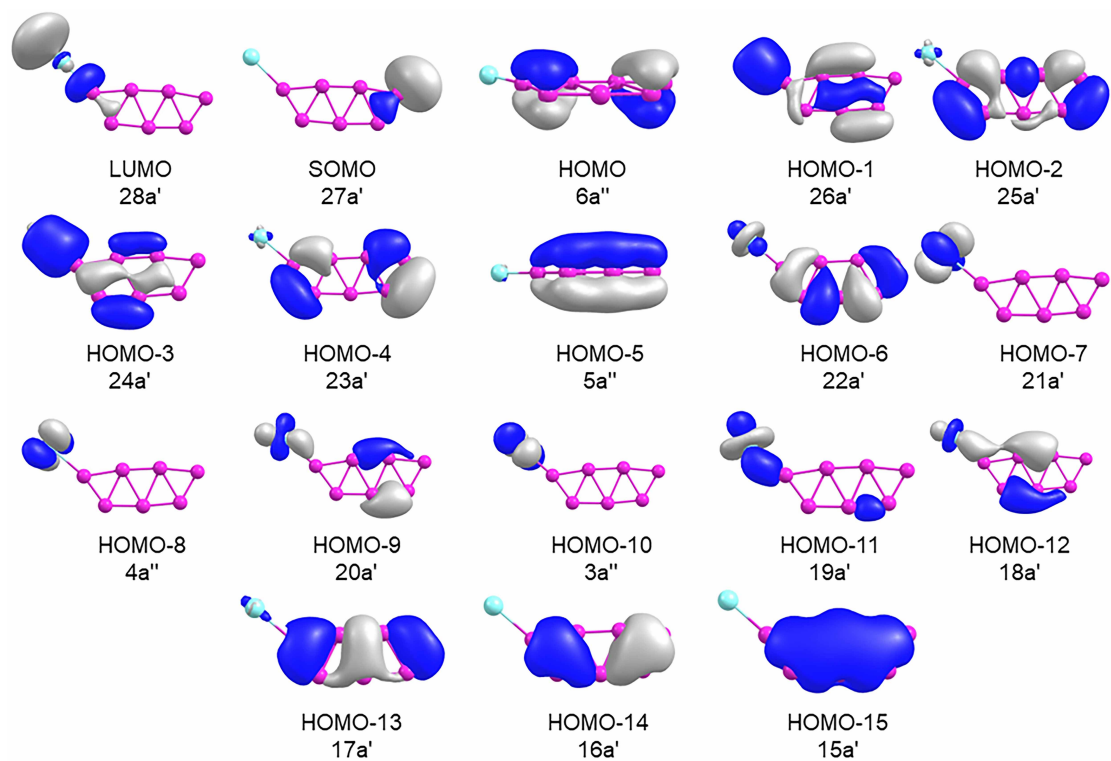

Fig. S3 The valence MOs for the GM of  $\text{CuB}_7^-$  ( $C_s$ ,  $^2A'$ ).

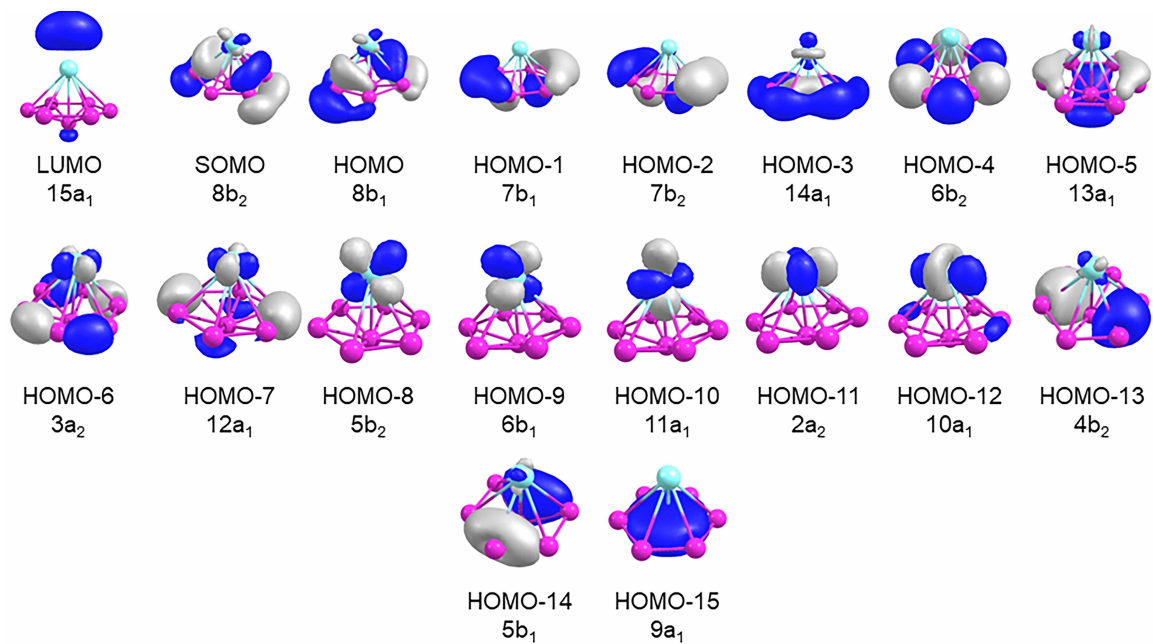

Fig. S4 The valence MOs for Iso1 of  $\text{CuB}_7^-$  ( $C_{2v}$ ,  $^2B_2$ ).

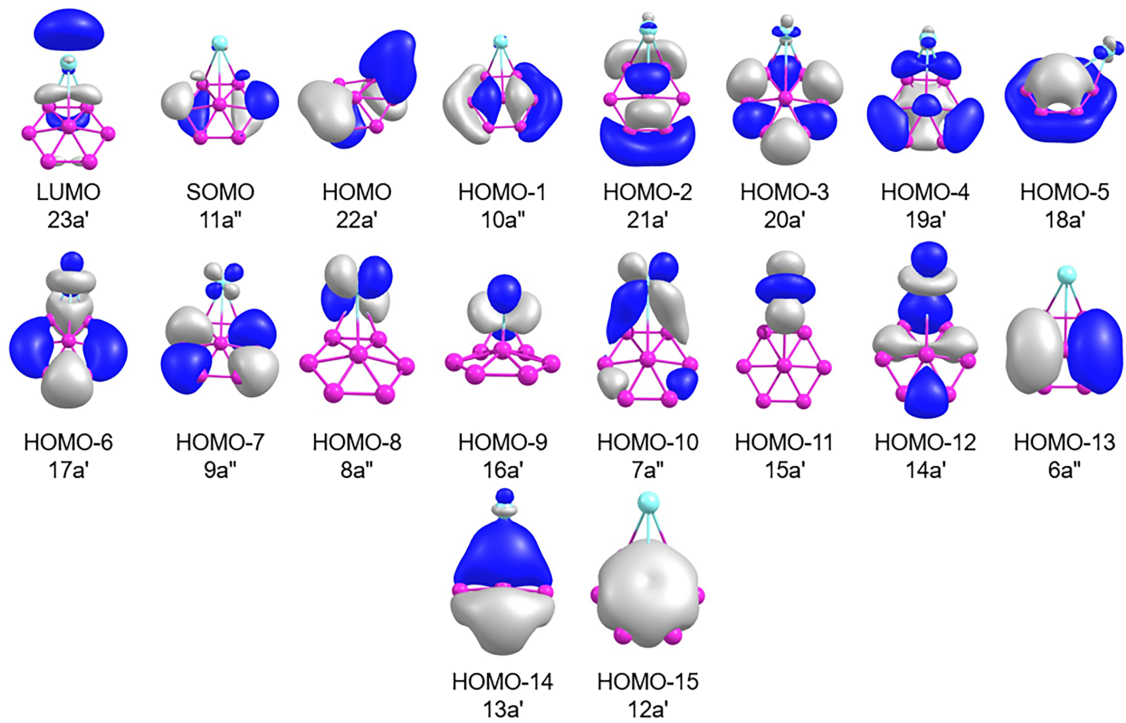

Fig. S5 The valence MOs for Iso2 of  $\text{CuB}_7^-$  ( $C_s, {}^2A''$ ).

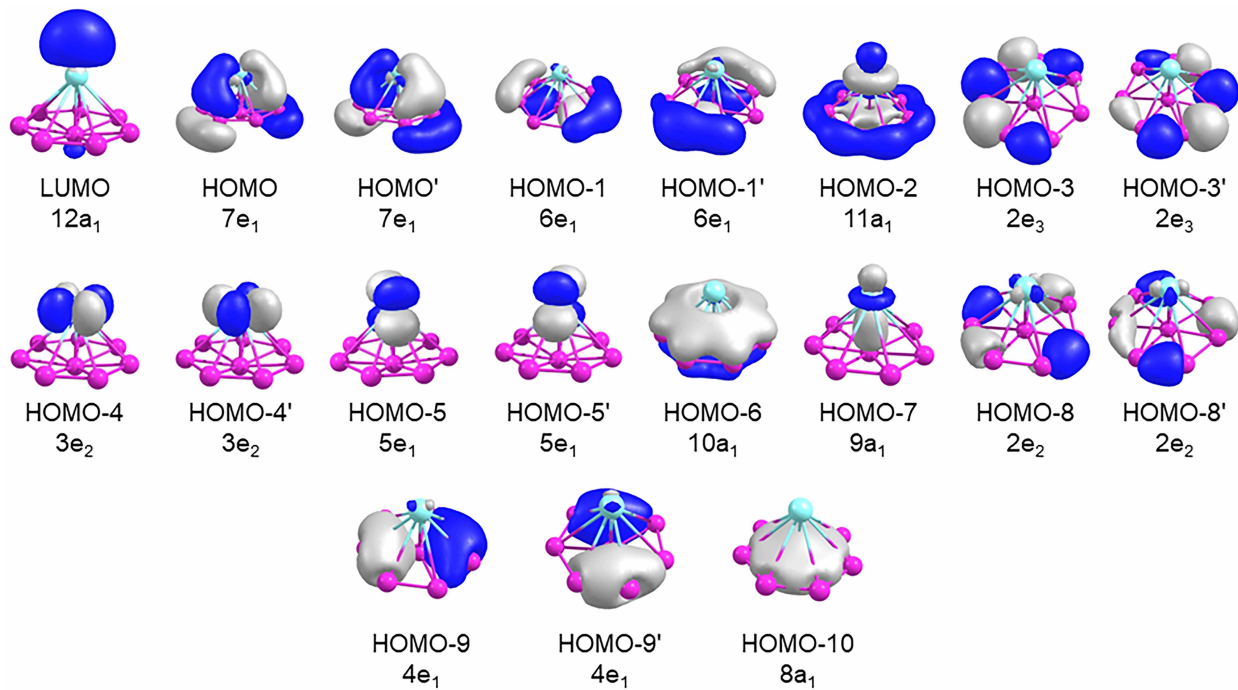

Fig. S6 The valence MOs for the GM of  $\text{CuB}_8^-$  ( $C_{7v}, {}^1A_1$ ).

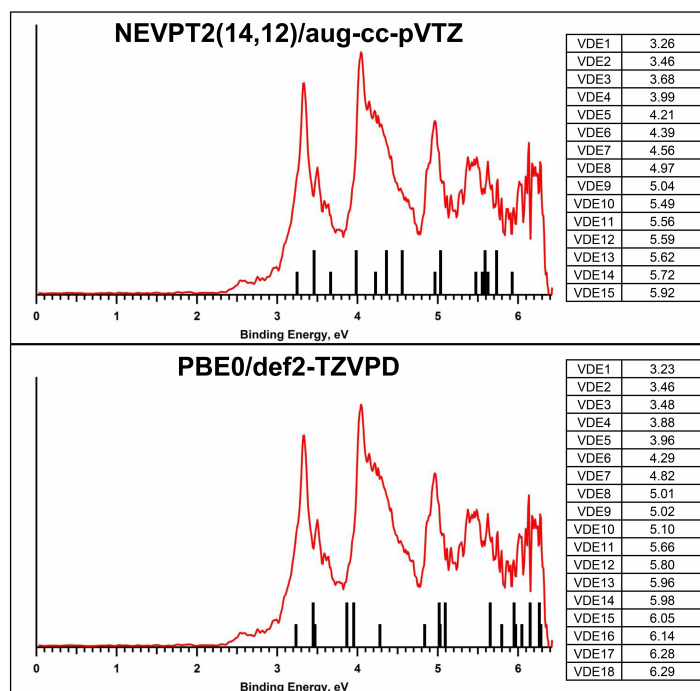

Fig. S7 Comparison of VDEs computed at the NEVPT2(14,12)/aug-cc-pVTZ and PBE0/def2-TZVPD levels of theory for the GM of  $\text{CuB}_7^-$ .

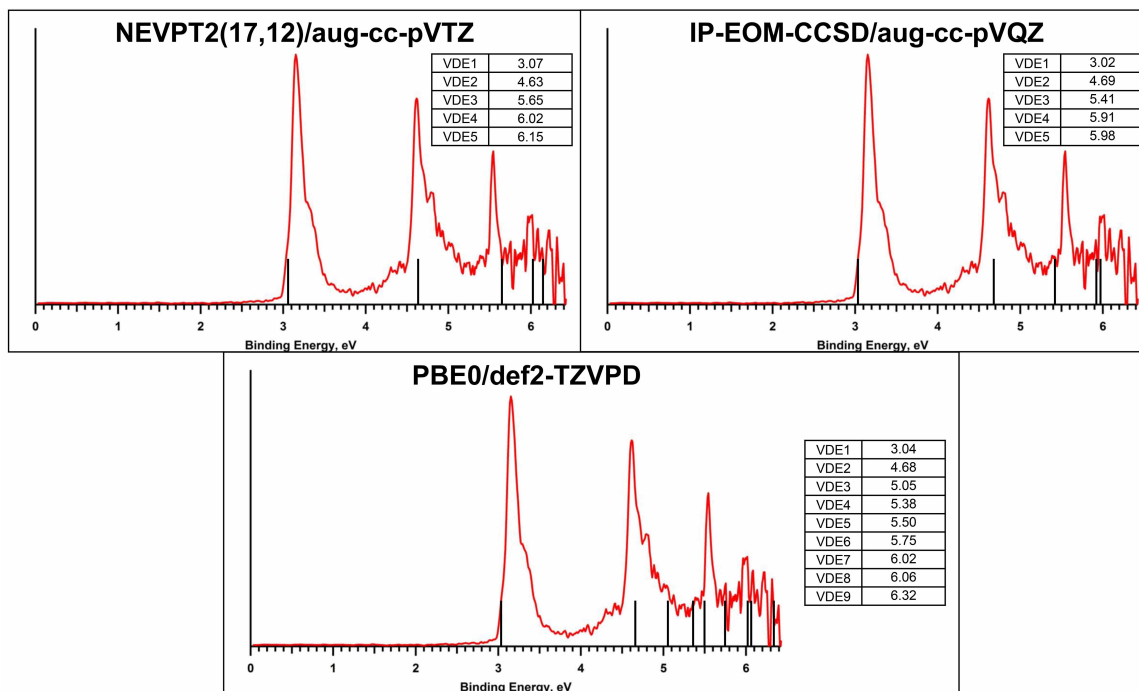

Fig. S8 Comparison of VDEs computed at the NEVPT2(17,12)/aug-cc-pVTZ, IP-EOM-CCSD/aug-cc-pVQZ, and PBE0/def2-TZVPD levels of theory for the GM of  $\text{CuB}_8^-$ .

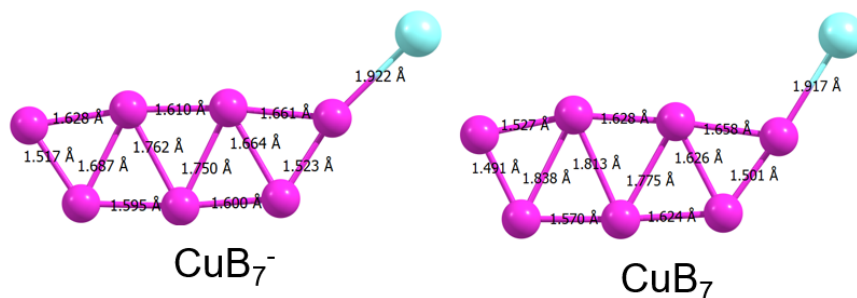

Fig. S9 Comparison of the GM structure of CuB<sub>7</sub><sup>-</sup> (C<sub>s</sub>, <sup>2</sup>A') with its corresponding neutral (C<sub>s</sub>, <sup>1</sup>A').

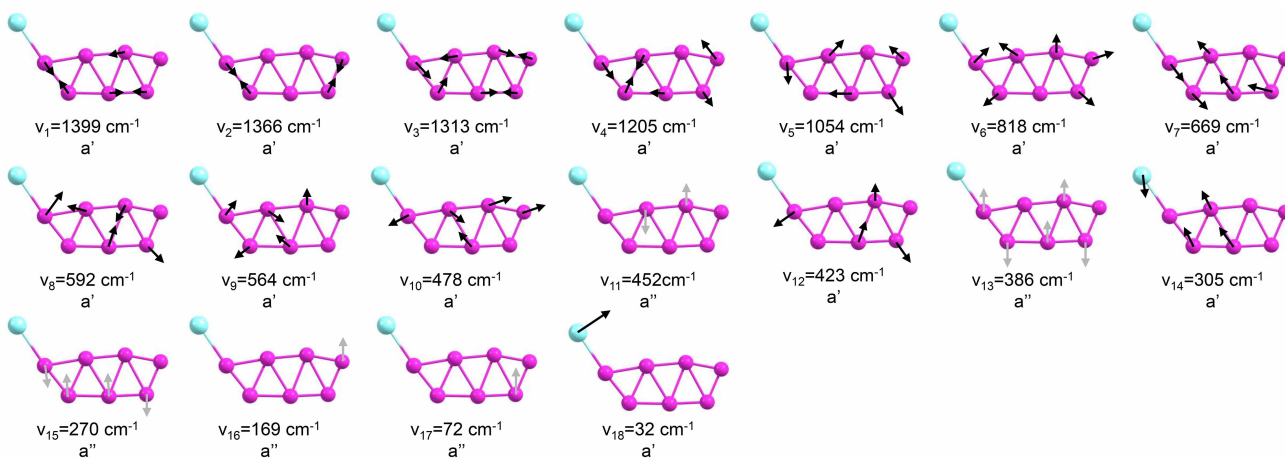

In the plane -  $\rightarrow$ , perpendicular to the plane -  $\uparrow$

Fig. S10 The vibrational modes and their computed harmonic frequencies for CuB<sub>7</sub> at the PBE0/def-TZVPD level of theory.

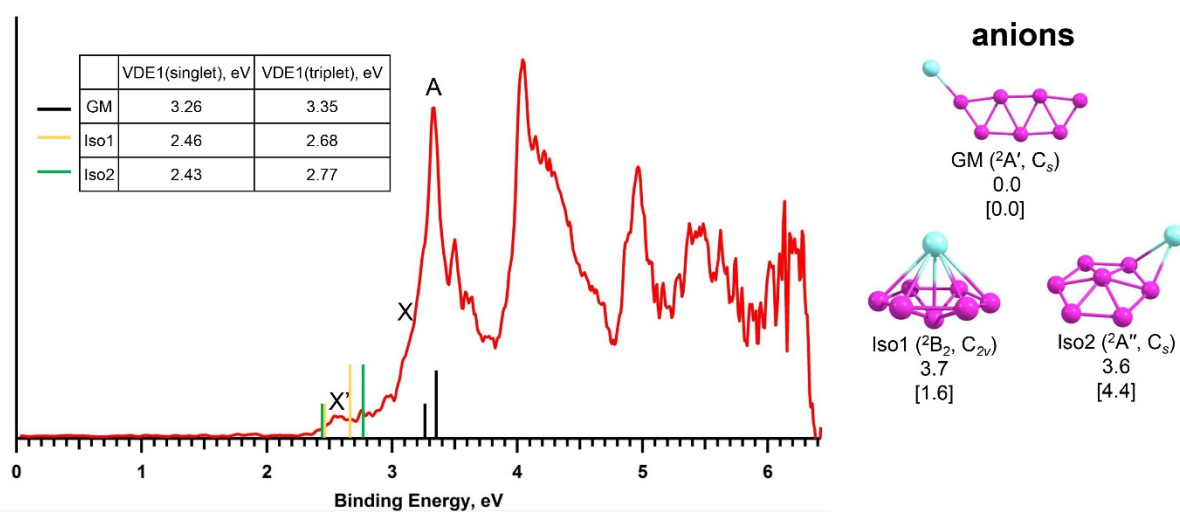

Fig. S11 Comparison of theoretical VDEs computed for the GM, Iso1, and Iso2 isomers of CuB<sub>7</sub><sup>-</sup> for the X', X, A bands.

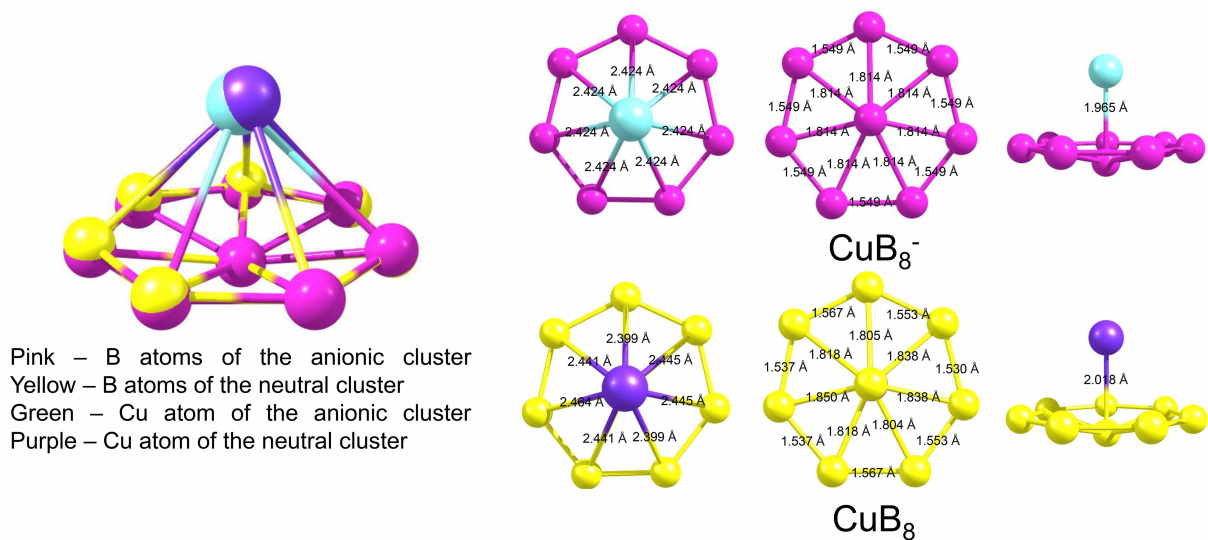

Fig. S12 Comparison of the GM structure of  $\text{CuB}_8^-$  ( $C_{7v}, {}^1A_1$ ) with its corresponding neutral ( $C_s, {}^2A'$ ).

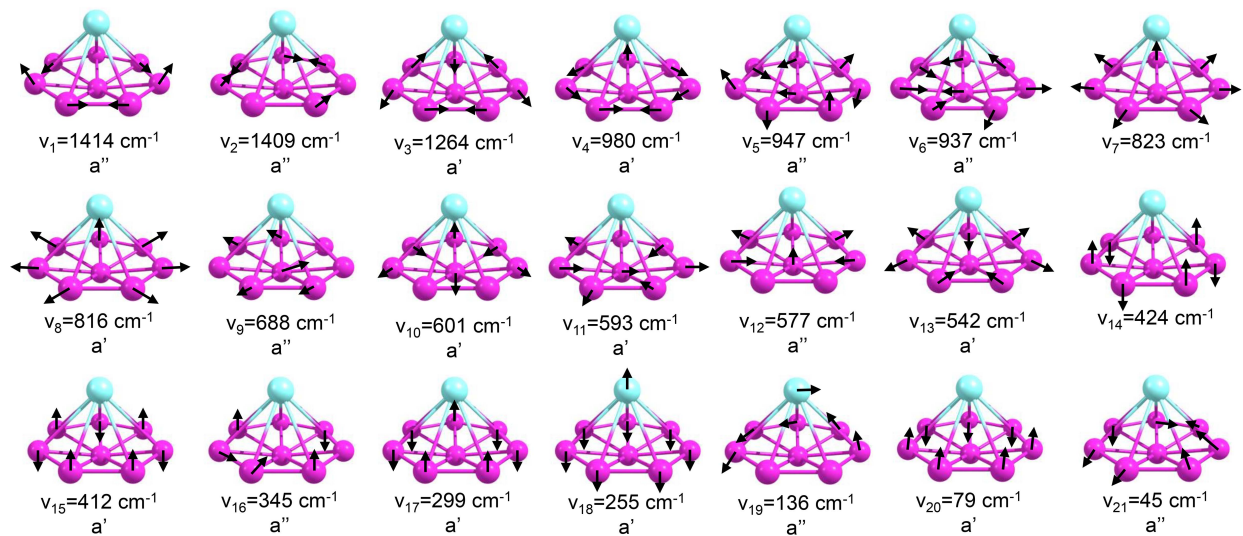

Fig. S13 The vibrational modes and their computed harmonic frequencies for  $\text{CuB}_8$  at the PBE0/def-TZVPD level of theory.

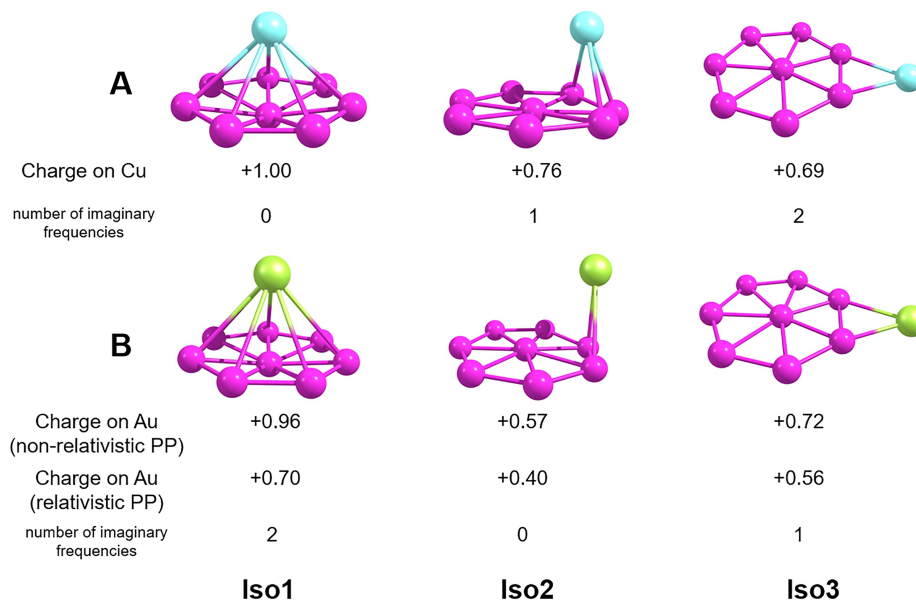

Fig. S14 Isomers with different positions of Cu/Au relative to the  $B_8$  wheel for (A)  $CuB_8^-$  and (B)  $AuB_8^-$ . We analyzed natural charges on the Cu/Au atoms depending on their positions relative to the  $B_8$  wheel in the singlet state of the anionic clusters. We employed the PBE0/def2-TZVPD level of theory for  $CuB_8^-$  and found +1.00 |e| on Cu in Iso1, +0.76 |e| for Iso2, and +0.69 |e| for Iso3. Only Iso1 is a local minimum for  $CuB_8^-$ , while Iso2 and Iso3 possess imaginary frequencies. For Au we employed two different energy-consistent pseudopotentials (PP) – the nonrelativistic ECP60MHF in conjunction with the ECP60MHF basis set<sup>1</sup> and the relativistic ECP60MDF with the AVTZ basis set.<sup>2,3</sup> For the nonrelativistic PP, we found +0.96 |e| charge on Au for Iso1, +0.57 |e| for Iso2, and +0.72 |e| for Iso3. Thus, Iso2 possesses the lowest charge on the Au atom, so it exhibits the most covalent interaction in this case. Both Iso1 and Iso3 have imaginary frequencies, making the edge position of Au atom in Iso2 the only stable configuration. Introduction of scalar-relativistic effects brings much lower charges on the Au atom – +0.70 |e| for Iso1, +0.40 |e| for Iso2, and +0.56 |e| for Iso3. The energy difference between Iso2 and Iso1 with the non-relativistic PP is 2.8 kcal/mol, while with the relativistic PP, it increases up to 16.4 kcal/mol. Thus, Au tends to acquire more covalent bonds than Cu in similar structures that can be attributed to the more diffuse orbitals on Au atoms and the relativistic effects, as seen from the comparison of nonrelativistic and relativistic pseudopotentials.

## References

- 1 P. Schwerdtfeger, M. Dolg, W. H. E. Schwarz, G. A. Bowmaker and P. D. W. Boyd, *J. Chem. Phys.* 1989, **91**, 1762–1774.
- 2 D. Figgen, G. Rauhut, M. Dolg and H. Stoll, *Chem. Phys.* 2005, **311**, 227–244.
- 3 K. A. Peterson and C. Puzzarini, *Theor. Chem. Acc.* 2005, **114**, 283–296.
